# Supplementary material for: Gene Expression in the Skin of Dogs Sensitized to the House Dust Mite Dermatophagoides farinae
Source: PubMed Central journal article supplement (PMC4199687; doi:10.1534/g3.114.013003), 2014-08-05
Supplement: supp_g3.114.013003_TableS1.pdf [file supp_g3.114.013003_TableS1.pdf]

**Table S1 Design of specimen collection;** each biopsy was cut into three pieces - one of these was used for histological analysis, the other two parts were used for microarray analysis

| day                      | 6 sensitized dogs                                                        | 6 non sensitized dogs                                                    |
|--------------------------|--------------------------------------------------------------------------|--------------------------------------------------------------------------|
| 4 days before patch test | clipping the left lateral thorax                                         |                                                                          |
| before patch test (0h)   | 1 biopsy (non treated skin) / dog                                        |                                                                          |
| patch test               | patch test with allergen*/saline                                         | patch test with allergen*/saline                                         |
| +6 h                     | 1 biopsy of each treatment-area (allergen and saline = 2 biopsies / dog) | 1 biopsy of each treatment-area (allergen and saline = 2 biopsies / dog) |
| +24 h                    | 1 biopsy of each treatment area (allergen and saline = 2 biopsies / dog) | 1 biopsy of each treatment area (allergen and saline = 2 biopsies / dog) |
| number of taken biopsies | 30                                                                       | 30                                                                       |
