# Supplementary material for: Gene Expression in the Skin of Dogs Sensitized to the House Dust Mite Dermatophagoides farinae
Source: PubMed Central journal article supplement (PMC4199687; doi:10.1534/g3.114.013003), 2014-08-05
Supplement: supp_g3.114.013003_TableS2.pdf [file supp_g3.114.013003_TableS2.pdf]

**Table S2 Sequences of the oligonucleotides used as primers for qPCR**

| GeneID                 | Accession Number       | Forward Primer          | Reverse Primer           |
|------------------------|------------------------|-------------------------|--------------------------|
| <sup>a</sup> RPL13A    | XM_533620              | CTGCCCCACAAGACCAAG      | GGGATCCCATCAAACACCT      |
| <sup>a</sup> LOC479750 | XM_536878              | GCAGGAAGGGATTCTCCAG     | GGTCCAGTAAGAAATCTTCCATAA |
| <sup>a</sup> UBB       | XM_858590              | CGCGGCTGGCATTGTTAGCTG   | GCATACCACCCCTCAGGCGC     |
| ALOXE3                 | XM_546605              | GCACCTGTGGCCAGAGCCCTA   | CAGCTCCGTGGAGCAGCACAC    |
| CCL8                   | NM_001005255           | TGCCAGCTTCAGCACCTTTGTCC | TGGGGTCAGCACAGATCTCCCTG  |
| CLEC7A                 | XM_849050              | TCAAGGCATCACTGGGCGACCT  | TCACAGCAATGGGACGCCAACG   |
| DMKN                   | XM_533694              | CTGGGGGTCAGGGCTTCGGA    | TCCTCCACTGGACCCGTGCC     |
| DSG1                   | NM_001002939           | CCCAGCAGCGATGAACTGGCA   | TCACGACAGGCTGCAGCGAA     |
| DSP                    | XM_545329              | TTCTGCAGGAGGAGGGCACCC   | GTGGCCTTCAGGCGAGTGAGC    |
| FCGR3A                 | XM_536141              | TGGCTGCACAATGGGAGACCCAT | GAGGGACCTGGAGCAAGAGCCA   |
| FLG2                   | XM_540329              | TGGCACACTGAGCAAGGATGAGC | GCTGAGAACCTTGTTGCAGGCCA  |
| IL13RA2                | NM_001003075           | TGGAAACCTGGCATGGGTGTCC  | TCTGCTGAATGGTCCAAGCCCTCA |
| IL18BP                 | NM_001048018           | GCCTCTCCTGGCTCCGACA     | CCGACCTGGGAGGTGCTCGA     |
| IL33                   | NM_001003180           | TTTGCTGCATGCCAACACGAGG  | AGGAAGAAGGCCTGGTCTGGCAA  |
| KPRP                   | ENSCAFT00000<br>020644 | AAGTCCCTGTCCACGTCCTGCT  | CGTGGCTCGGGAAATTCACGCT   |
| LOC476953              | XM_534152              | CAGCACCAGCATCCCAGCTCC   | CCCGTGCTTGGGATGGCACT     |
| OCLN                   | NM_001003195           | GCTCTGGGATCCTGCTCGTCT   | CGTGCATGTCCCCACCGTACAC   |

|        |              |                       |                        |
|--------|--------------|-----------------------|------------------------|
| PPARA  | NM_001003093 | AAAGCCCGGGTCATCCTCGC  | GCGCACCTCTGCCTCCTTGTT  |
| SOCS3  | NM_001031631 | TGAACGCAGTGTGCAAGCTGC | AGCGTGAAGAAGTGGCGCTGG  |
| SPINK5 | NM_001025397 | GCGTGGCCCAGATGGCAAGA  | GCCACCACCGTGGGAAGTGT   |
| TGM1   | NM_001003079 | CGGGTGGCAAGTGGTAGACGC | TGGATTCCACAGAGCAGGGGCC |

---

<sup>a</sup>Housekeeping Gene
